# Supplementary material for: Technically Challenging Percutaneous Interventions of Chronic Total Occlusions Are Associated with Enhanced Platelet Activation
Source: MDPI journal article supplement (doi:10.3390/jcm12216829), 2023-10-29
Supplement: s1 [file s1]

## Technically challenging percutaneous interventions of chronic total occlusions are associated with enhanced platelet activation

**Supplementary Table S1. See .xls file named Supplementary Table S1 – Primers.xls**

|                                  | J-CTO score 0 and 1<br>n = 24 | J-CTO score 2 and 3<br>n = 26 | p value      |
|----------------------------------|-------------------------------|-------------------------------|--------------|
| Age (years)                      | 58.67 ± 8.07                  | 64.65 ± 8.43                  | <b>0.019</b> |
| Male, n (%)                      | 15 (62.5)                     | 15 (57,7)                     | 0.729        |
| Hypertension, n (%)              | 21 (87.5)                     | 21 (80.8)                     | 0.516        |
| Hyperlipidemia, n (%)            | 22 (91.7)                     | 26 (100)                      | 0.133        |
| Obesity, n (%)                   | 20 (83.3)                     | 25 (96.2)                     | 0.131        |
| AMI in anamnesis, n (%)          | 10 (41.7)                     | 12 (46.2)                     | 0.749        |
| DM in anamnesis, n (%)           | 9 (37.5)                      | 10 (38.5)                     | 0.944        |
| ACEi / ARB, n (%)                | 21 (87.5)                     | 23 (88.5)                     | 0.917        |
| BB, n (%)                        | 19 (79.2)                     | 26 (100)                      | <b>0.014</b> |
| Nitrates, n (%)                  | 7 (29.2)                      | 14 (53.8)                     | 0.077        |
| Statin, n (%)                    | 18 (75)                       | 25 (96.2)                     | <b>0.031</b> |
| Total number of stents           | 40                            | 46                            | 0.726        |
| Total stent length (mm)          | 1 178                         | 1 415                         | 0.456        |
| Average number of stents / PCI   | 1,67                          | 1,77                          |              |
| Average total stent length / PCI | 49.08 mm                      | 54.52 mm                      |              |

**Supplementary Table S2. Demographic, clinical and lesion characteristics of recruited**

**patients in the aspect of J-CTO score division.** Data are displayed as the mean ± standard deviation (SD). Mann-Whitney test, Chi<sup>2</sup>-test or Fischer's exact test were used as appropriate.

AMI: acute myocardial infarction, DM: diabetes mellitus, J-CTO: Japanese chronic total occlusion score, ACEi: angiotensin-converting enzyme inhibitor, ARB: angiotensin receptor blocker, BB: beta-blocker, PCI: percutaneous coronary intervention.

|                     | shorter procedure<br>n = 24 | longer procedure<br>n = 20 | p value |
|---------------------|-----------------------------|----------------------------|---------|
| Age (years)         | 61.04 ± 9.79                | 63.20 ± 7.99               | 0.516   |
| Male, n (%)         | 11 (45.8)                   | 14 (70)                    | 0.107   |
| Hypertension, n (%) | 20 (83.3)                   | 16 (80)                    | 0.775   |

|                         |           |          |       |
|-------------------------|-----------|----------|-------|
| Hyperlipidemia, n (%)   | 22 (91.7) | 20 (100) | 0.186 |
| Obesity, n (%)          | 20 (83.3) | 19 (95)  | 0.225 |
| AMI in anamnesis, n (%) | 9 (37.5)  | 10 (50)  | 0.405 |
| DM in anamnesis, n (%)  | 6 (25)    | 9 (45)   | 0.163 |
| ACEi / ARB, n (%)       | 20 (83.3) | 18 (90)  | 0.521 |
| BB, n (%)               | 22 (91.7) | 18 (90)  | 0.848 |
| Nitrates, n (%)         | 13 (54.2) | 5 (25)   | 0.050 |
| Statin, n (%)           | 18 (75)   | 19 (95)  | 0.071 |

**Supplementary Table S3. Demographic and clinical characteristics of recruited patients**

**in the aspect of the procedure duration.** Shorter duration of intervention means 40 to 117 minutes, while procedure was considered long, if the duration was between 118 and 255 minutes. In case of 6 patients the duration of intervention is missing. Data are displayed as the mean  $\pm$  standard deviation (SD). Mann-Whitney test, Chi<sup>2</sup>-test or Fischer's exact test were used as appropriate. AMI: acute myocardial infarction, DM: diabetes mellitus, J-CTO: Japanese chronic total occlusion score, ACEi: angiotensin-converting enzyme inhibitor, ARB: angiotensin receptor blocker, BB: beta-blocker
