# Supplementary material for: Technically Challenging Percutaneous Interventions of Chronic Total Occlusions Are Associated with Enhanced Platelet Activation
Source: J Clin Med. 2023 Oct 29;12(21):6829. doi: 10.3390/jcm12216829 (PMC10648871; doi:10.3390/jcm12216829)
Supplement: Supplementary file 1 [file jcm-12-06829-s001.zip › Supplementary Table S1 Primers.xlsx]

## Sheet: Munka1
Mature miRNAs	Stem-loop primers for reverse transcription	Forward primers for RT-qPCR	Universal reverse primer for RT-qPCR	Mature miRNA sequences
hsa-miR-223-3p	5' - GTTGGCTCTGGTGCAGGGTCCGAGGTATTCGCACCAGAGCCAAC TGGGGT - 3'	5' - GTTGGGTGTCAGTTTGTCAAAT - 3'	5' - GTGCAGGGTCCGAGGT - 3'	5' - UGUCAGUUUGUCAAAUACCCCA - 3'
hsa-miR-181b-5p	5' - GTTGGCTCTGGTGCAGGGTCCGAGGTATTCGCACCAGAGCCAAC ACCCAC - 3'	5' - GTTTGAACATTCATTGCTGTCG - 3'	5' - GTGCAGGGTCCGAGGT - 3'	5’ - AACAUUCAUUGCUGUCGGUGGGU –-3’
hsa-miR-126-3p	5' - GTTGGCTCTGGTGCAGGGTCCGAGGTATTCGCACCAGAGCCAAC CGCATT - 3'	5' - GGGTCGTACCGTGAGTAAT - 3'	5' - GTGCAGGGTCCGAGGT - 3'	5' - UCGUACCGUGAGUAAUAAUGCG - 3'
cel-miR-39-3p	5' - GTTGGCTCTGGTGCAGGGTCCGAGGTATTCGCACCAGAGCCAAC CAAGCT - 3'	5' - GTGTCACCGGGTGTAAATC - 3'	5' - GTGCAGGGTCCGAGGT - 3'	5' - UCACCGGGUGUAAAUCAGCUUG - 3'
Supplementary Table S1. Sequences of primers that were used for RT-qPCR analysis of extracellular miRNAs . RT-qPCR: reverse transcription quantitative polymerase chain reaction
